# Supplementary material for: Self-assembled Epitaxial Ferroelectric Oxide Nano-spring with Super-scalability
Source: Research Square preprint supplement (doi:10.21203/rs.3.rs-779080/v1), 2021-08-12
Supplement: Supplementary file 1 [file 0987849599d9bf0231aa83b3.docx]

Supplementary Materials for

**Self-assembled Epitaxial Ferroelectric Oxide Nano-spring with Super-scalability**

Guohua Dong1, #, Yue Hu2, # , Changqing Guo3, #, Haijun Wu4, Haixia Liu1, Ruobo Peng1, Dan Xian5, Qi Mao5, Yongqi Dong6, Yanan Zhao1, Bin Peng1, Zhiguang Wang1, Zhongqiang Hu1, Junwei Zhang2, Xueyun Wang3, Jiawang Hong3, Zhenlin Luo6, Wei Ren1, Zuo-Guang Ye1,7, Zhuangde Jiang5, Ziyao Zhou1★, Houbing Huang3★, Yong Peng2★, Ming Liu1★

*Correspondence to: mingliu@xjtu.edu.cn; ziyaozhou@xjtu.edu.cn; hbhuang@bit.edu.cn; pengy@lzu.edu.cn.

**Materials and Methods**

**Thin Film Deposition:** BaTiO3 (BTO), La0.7Sr0.3MnO3 (LSMO), and Sr3Al2O6 (SAO) targets were prepared by the conventional solid-state method. These targets were used to fabricate the LSMO/BTO/SAO/STO (001) heterostructures by a pulsed laser deposition (PLD) system with a KrF excimer laser of 248 nm wavelength. Base pressure was below 1×10-6 Torr. The target-substrate distance was fixed at 50 mm. Firstly, 30 - 40 nm SAO thin films were deposited as a sacrificial layer with an energy density of 1.8 J cm−2, repetition rate of 3 Hz, and substrate temperature of 800° C. Then, the BTO and LSMO films were grown at 750 °C and 2 Hz. During the growth of BTO and LSMO, oxygen gas partial pressures were maintained at 100 and 200 mTorr, respectively. After deposition, the samples were in situ annealed at 750 °C for 10 min and then slowly cooled to room temperature.

**Fabrication of LSMO/BTO** **Nano-spring:** The SAO sacrificial layer was completely and quickly removed in de-ionized water at room temperature. The polydimethylsiloxane (PDMS) as a supporting layer should be coated on the LSMO/BTO heterostructures during etching SAO. While the LSMO/BTO heterostructures are transferred on PDMS, they were broken and self-assembled into regular nanostripes along [110] crystal direction of BTO. The dynamic releasing process is shown in Supplementary movie 1. After that, with desorption from the PDMS, LSMO/BTO nanostripes coil themselves up into nano-springs due to the large lattice mismatch between LSMO and BTO.

**Structure and Performance Characterizations:** The reciprocal space mapping (RSM) of the films was investigated using a high-resolution synchrotron X-ray, which was recorded with the 14B beamline of the Shanghai Synchrotron Radiation Facility (SSRF). XRD measurements were performed using a PANalytical Empyrean diffractometer. The morphology was characterized by atomic force microscopy (Bruker, Dimension Icon). Cross-sectional samples for TEM observations were prepared by the focused ion beam technique (FIB, Tescan MIRA 3). Meanwhile, the in situ SEM experiments were conducted by the double beam system in FIB. In situ TEM experiments of nano-spring were performed F30 (FEI Tecnai) with in situ mechanical sample holder (PI-95, HYSITRON, USA). Moreover, the microstructure of films and springs was imaged using a probe aberration-corrected scanning transmission electron microscopy (Cs-STEM, Themis Z G2 300kV, FEI).

**Phase-field Simulations:**

Phase-field simulations are performed to investigate the ferroelectric polarization distributions in the LSMO/BTO nano-spring. The time-dependent Ginzburg–Landau equation describes the temporal evolution of the polarization:

where is polarization, ***r*** is the spatial coordinate, *t* is the evolution time, *L* is the kinetic coefficient, and *F* is the total free energy that includes the contributions from the Landau energy, the gradient energy, the elastic energy and the electric energy(*1*):

The Landau energy density is given by,

where are the Landau energy coefficients.

The gradient energy density is described as follows,

where are the gradient energy coefficients, and *.*

The elastic energy density is given by,

where is the elastic stiffness tensor, and are the total local strain and eigenstrain, respectively. And , where are the electrostrictive coefficients.

The electric energy density is expressed as,

where is the electric field component, is the vacuum permittivity, and is the dielectric constant.

The flexoelectric coupling energy is given by,

where is the flexoelectricity tensor. There are three independent flexoelectric coupling coefficients for a material of cubic point group: the longitudinal coupling coefficient , the transversal coupling coefficient , and the shear coupling coefficient . Here, , , and are the Voigt form of the flexoelectricity tensor components , , and , respectively.

In this work, the height of a periodic structure of LSMO/BTO nano-spring is 100 nm, the outer diameter is 80 nm, and the width is 18 nm. The BTO layer thickness is 8 nm, the thickness of the LSMO layer is set to 7 nm, where the BTO layer is thicker than the LSMO layer. The open-circuit condition is applied in simulation, and the temperature is 300 K. The parameters in the simulation are listed in Table S2(*2, 3*). The phase-field modeling of the domain evolution of an LSMO/BTO nano-spring under compression and elongation test is shown in Figure S11, the vortex domain can be observed in the initial state and disappears after the compression (elongation) test. After releasing the nano-spring, the vortex domain will be obtained again. The simulated results indicate that these nano-springs present good elasticity and recovery capability under both elongation and compression. The corresponding domain evolution shows that the polarization has a strong coupling with the bending strain. Furthermore, the vortex domain structure disappears and generates during the compression and elongation test, which indicates the vortex structure plays a significant role in enhancing the elasticity and recovery capability.

To analyze the coupling relationship between strain and polarization of the BTO nano-springs. The coordinate system is converted into the natural coordinate system, as shown in fig. S15(a), the *φ*-axis is perpendicular to the BTO layer outward, and the *r-*axis and *θ*-axis within the BTO layer. The direction of the *r*-axis is upward from the bottom of the nano-spring along the helix of the nano-spring, while the *θ*-axis is always perpendicular to the *r*-axis and points to the top of the nano-spring.

The flexoelectric effect is considered in the phase-field simulation, As shown in fig. S16, the influence of flexoelectric effect is not obvious during the uniaxial tensile (compression) deformation of BTO nano-springs.

**Supplementary Figures**


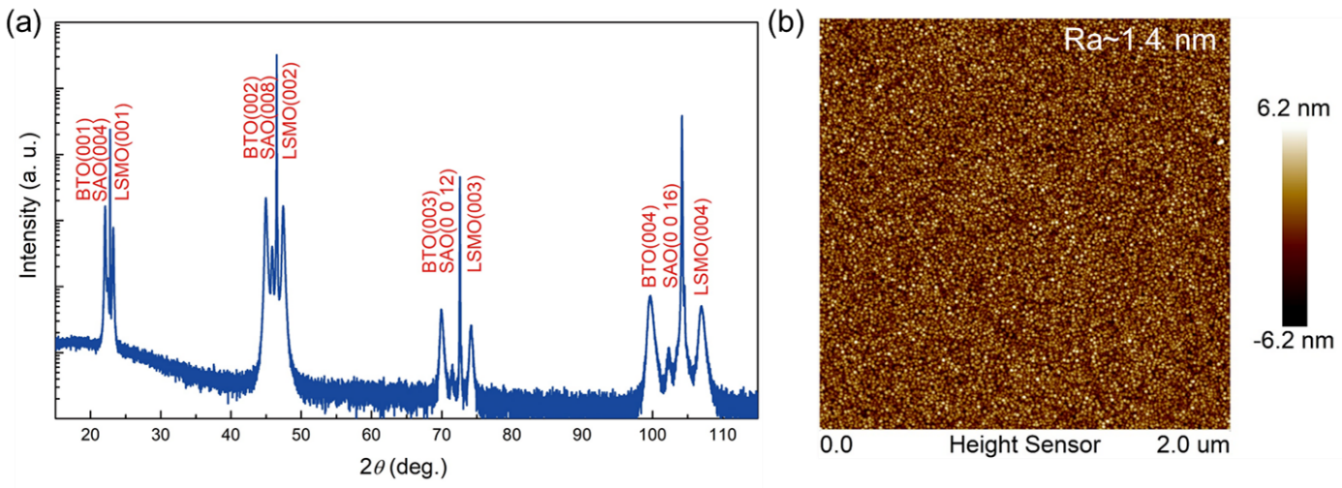


**Figure S1 Epitaxial growth of LSMO/BTO/SAO heterostructure.** (a) X-ray diffraction pattern of the LSMO/BTO/SAO/STO heterostructures. (b) AFM image of LSMO/BTO/SAO/STO.


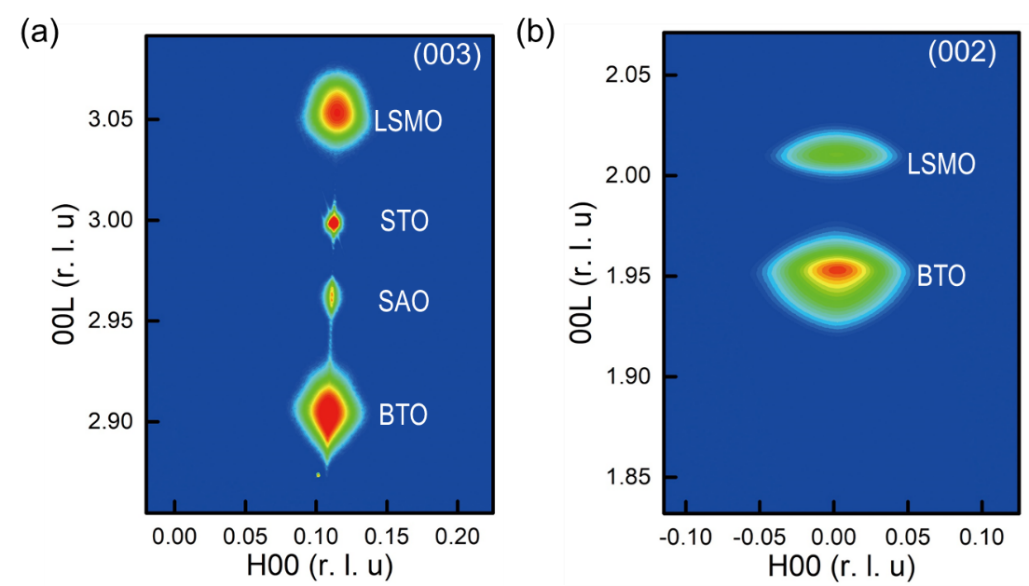


**Figure S2** (a) RSM of LSMO/BTO/SAO/STO around the 003-BTO Bragg peaks. (b) RSM of LSMO/BTO around the 002-BTO Bragg peaks.


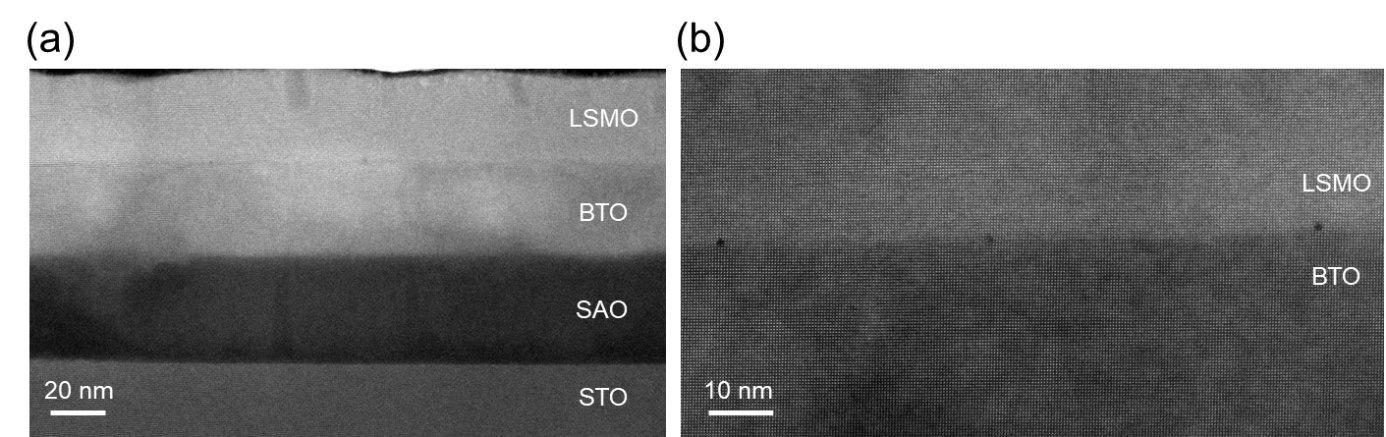


**Figure S3** STEM-HAADF images of (a) the LSMO/BTO/SAO/STO heterostructure, and (b) the interface of LSMO/BTO.


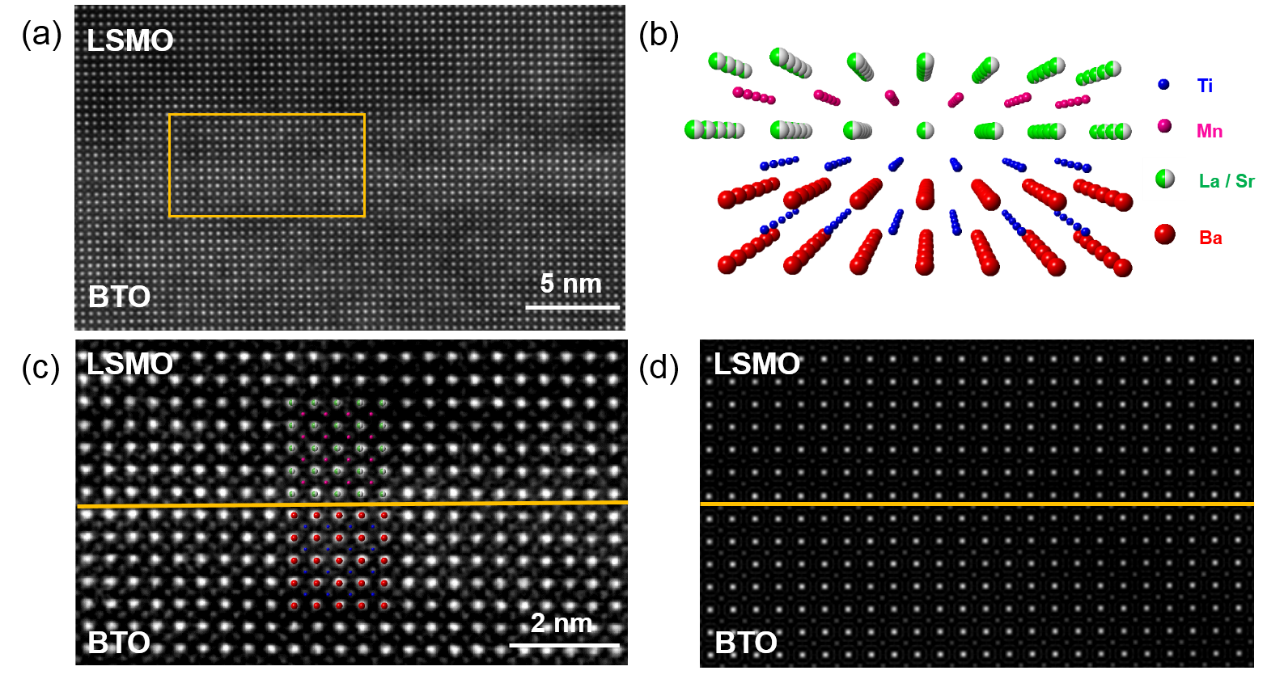


**Figure S4** (a) Atomic-resolution HAADF-STEM image of the cross-sectional specimen, showing an obvious interface structure of the BTO/LSMO. (b) Crystal models of the well-epitaxial BTO/LSMO interface. (c) Magnified the image of the yellow box area in (a). The schematic atoms (same colors as depicted in (a) indicate the occupancies of La/Sr, Mn, Ba and Ti atoms. (d) Atomic columns of the heterostructural interface simulated by using QSTEM software.


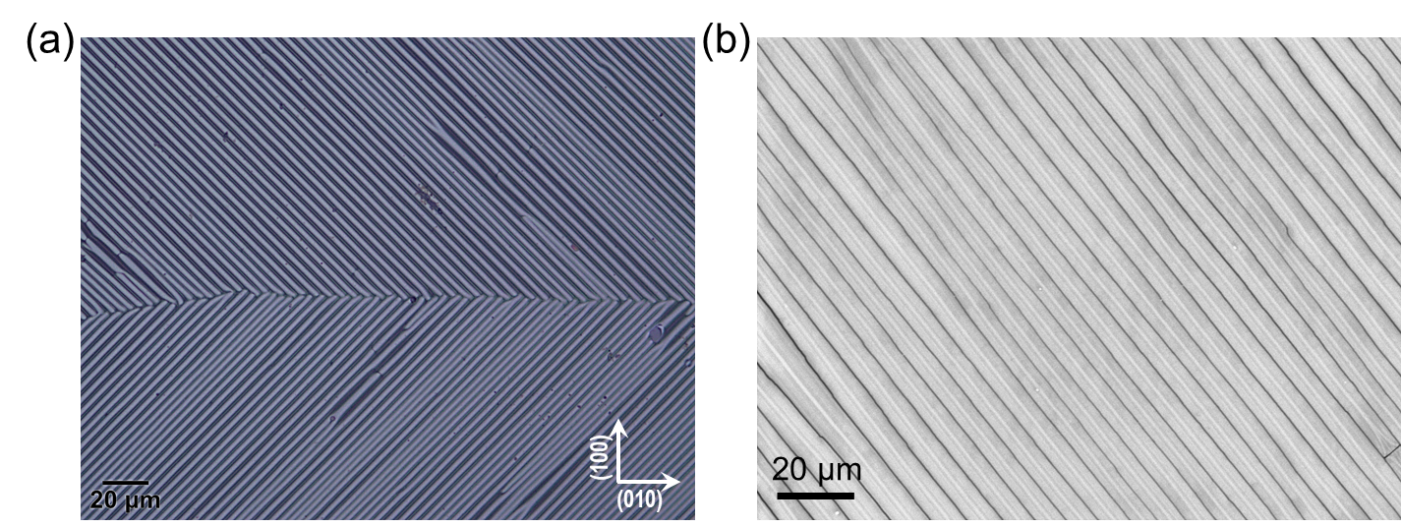


**Figure S5** (a) Optical image of LSMO/BTO/PDMS. (b) SEM image of LSMO/BTO nanostripes on PDMS.


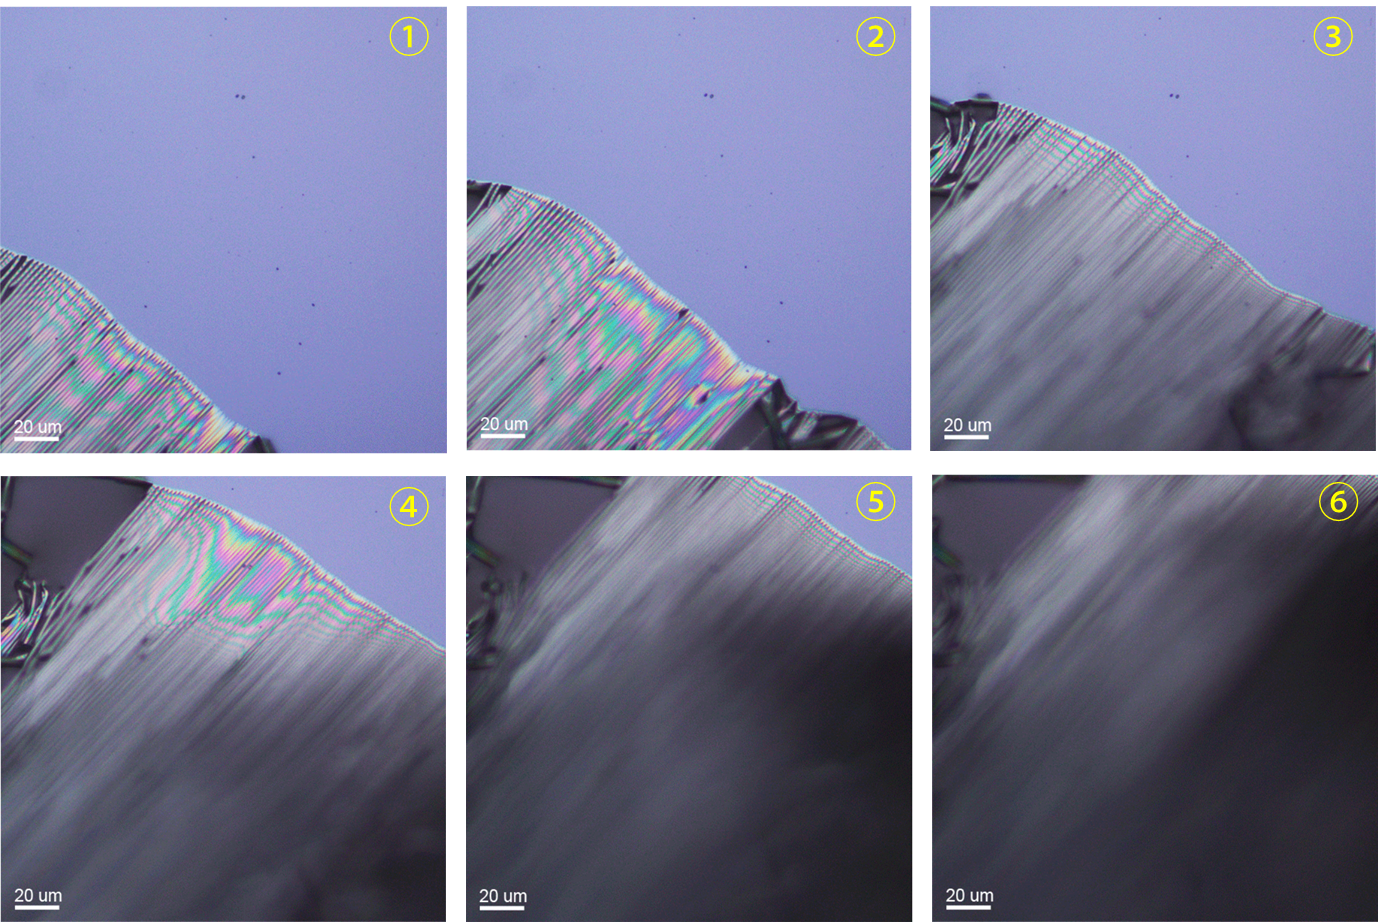


**Figure S6** Optical images of LSMO/BTO/SAO/STO during the peel-off process in water.


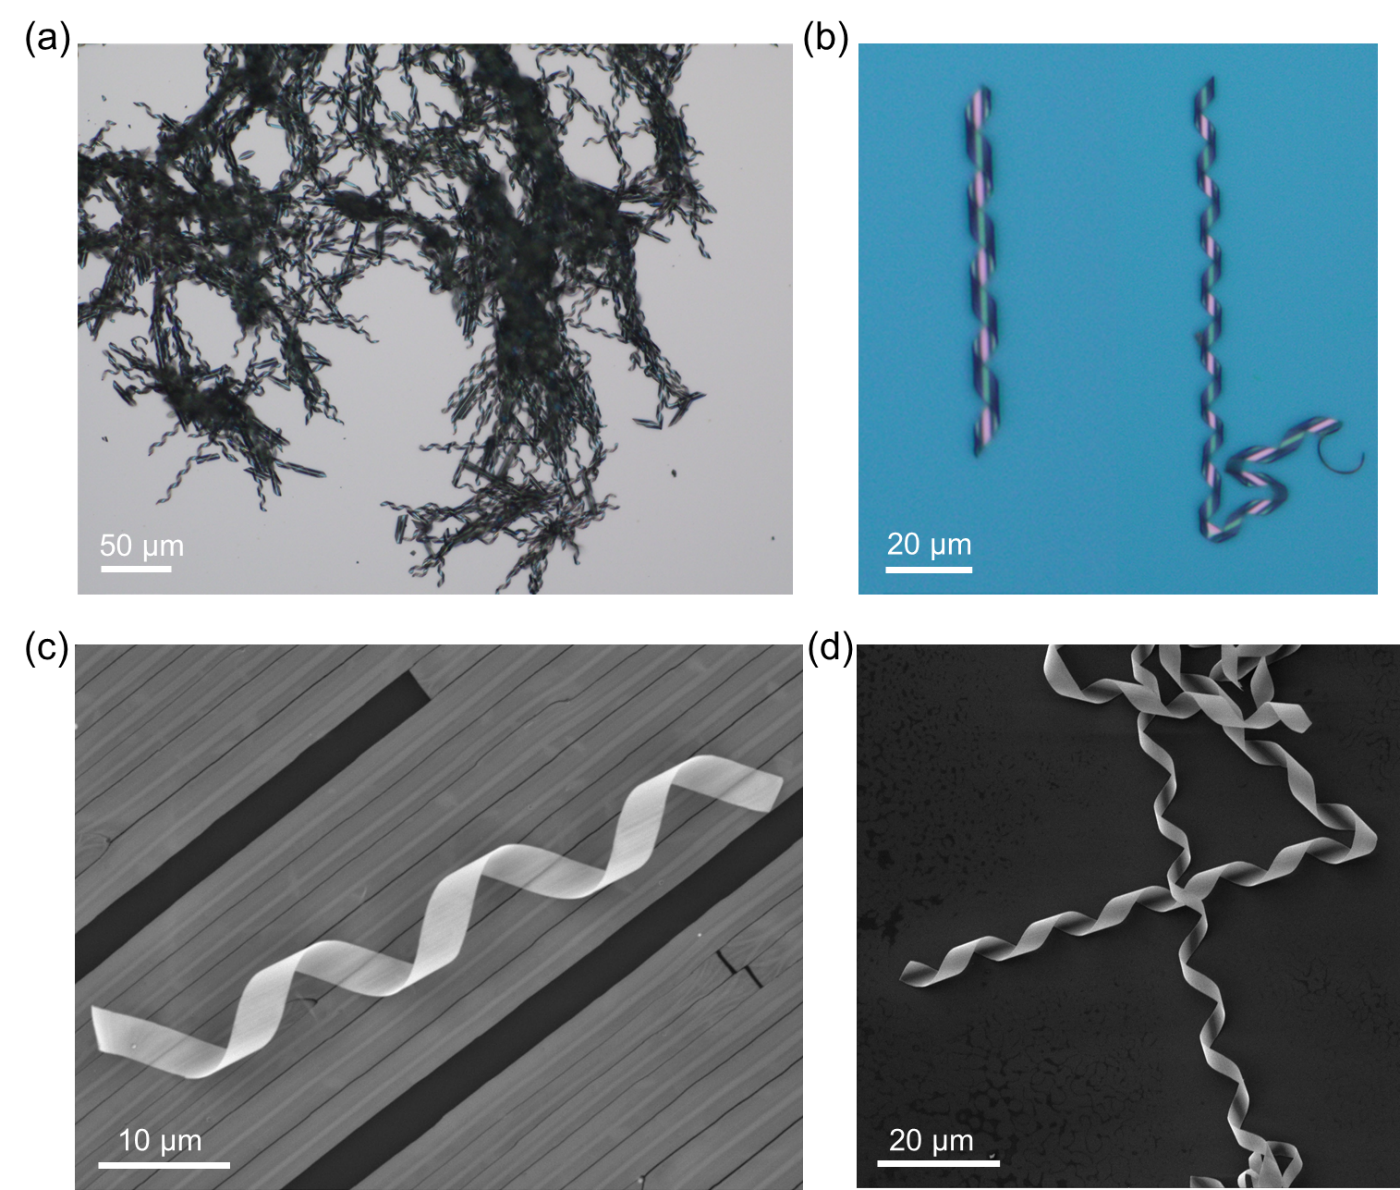


**Figure S7** (a) and (b) Optical images of LSMO/BTO springs on STO. (c) SEM image of LSMO/BTO nanostripes and spring. (d) SEM image of LSMO/BTO springs.


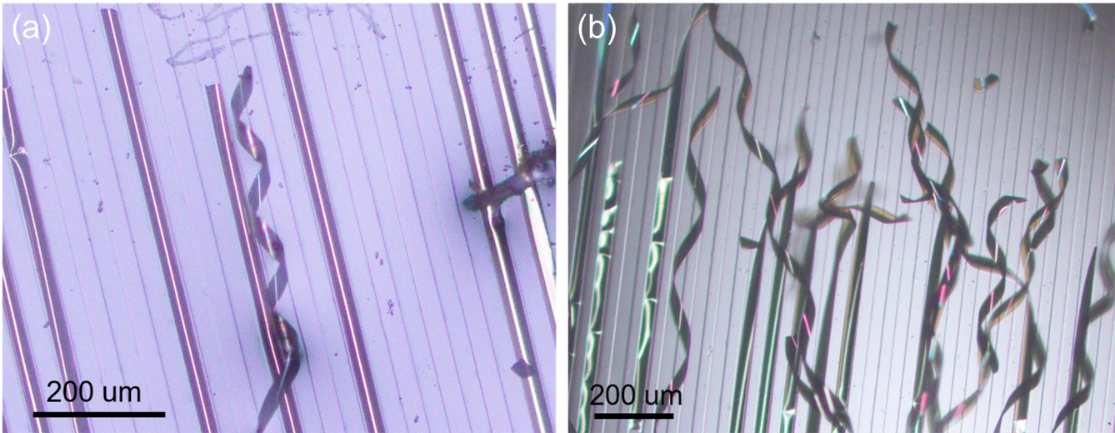


**Figure S8** Optical images of MZFO/BTO (a) and MZFO/PMN-PT (b) springs.


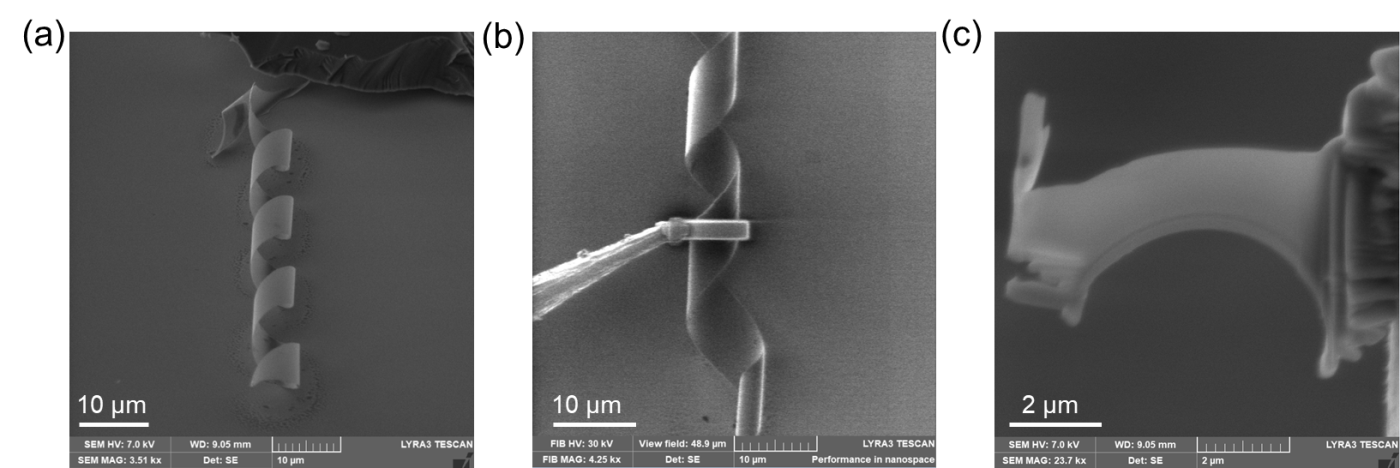


**Figure S9** (a) SEM image of a LSMO/BTO spring in FIB. (b) SEM image showing the TEM sample preparation via FIB. (c) SEM image showing the cross-sectional TEM sample.


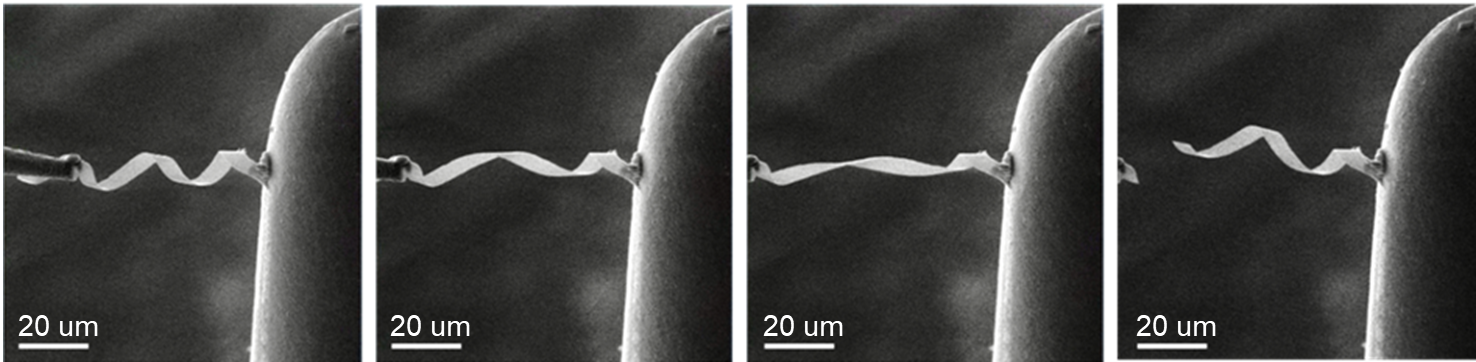


**Figure S10** In situ SEM image of LSMO/BTO spring


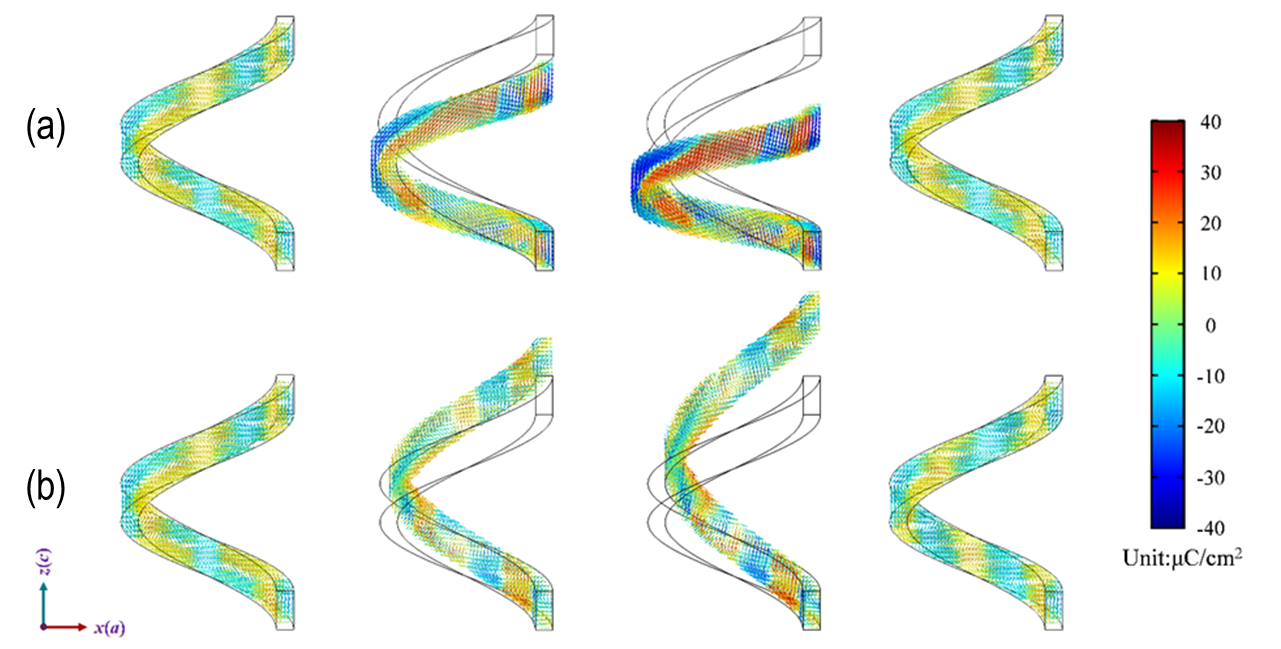


**Figure S11** The LSMO/BTO nano-spring ferroelectric domain evolution from phase-field simulation under (a) compression and (b) elongation tests.


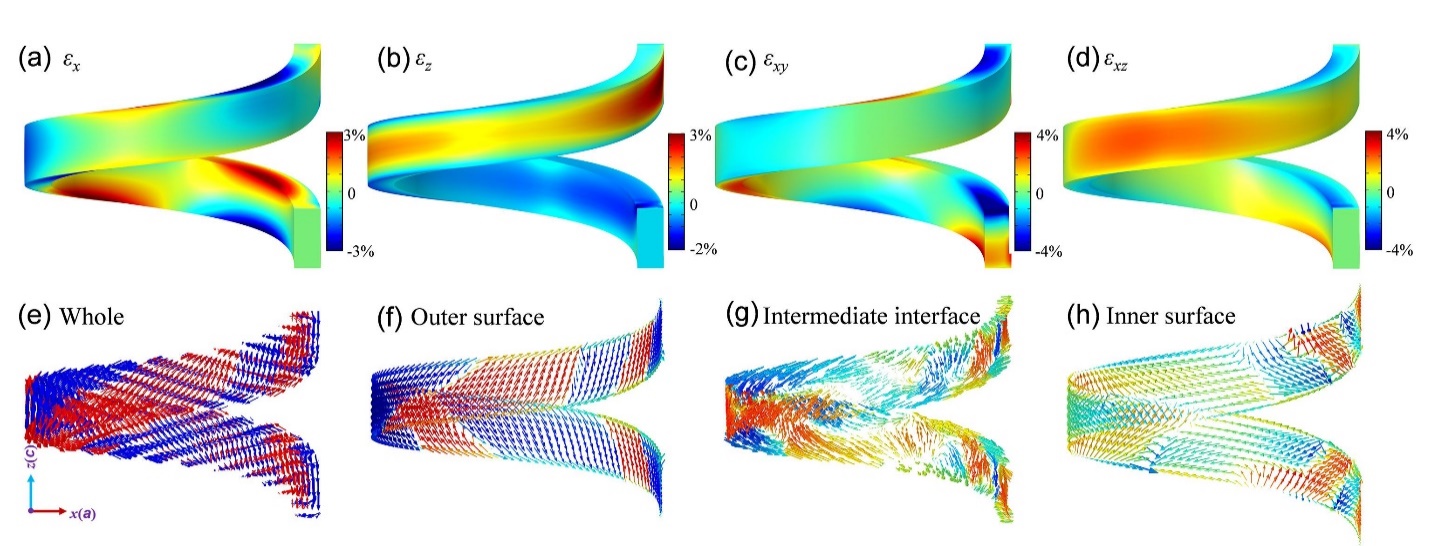


**Figure S12** **The distribution of strain and polarization in BTO nano-spring under compressive deformation (compressive displacement *z*=50 nm).** (a-d) The distribution of strain components *εx*, *εz*, *εxy*, and *εxz*. (e-h) The polarization distribution of the (e) whole, (f) outer surface, (g) intermediate interface, and (h) inner surface of nano-spring.


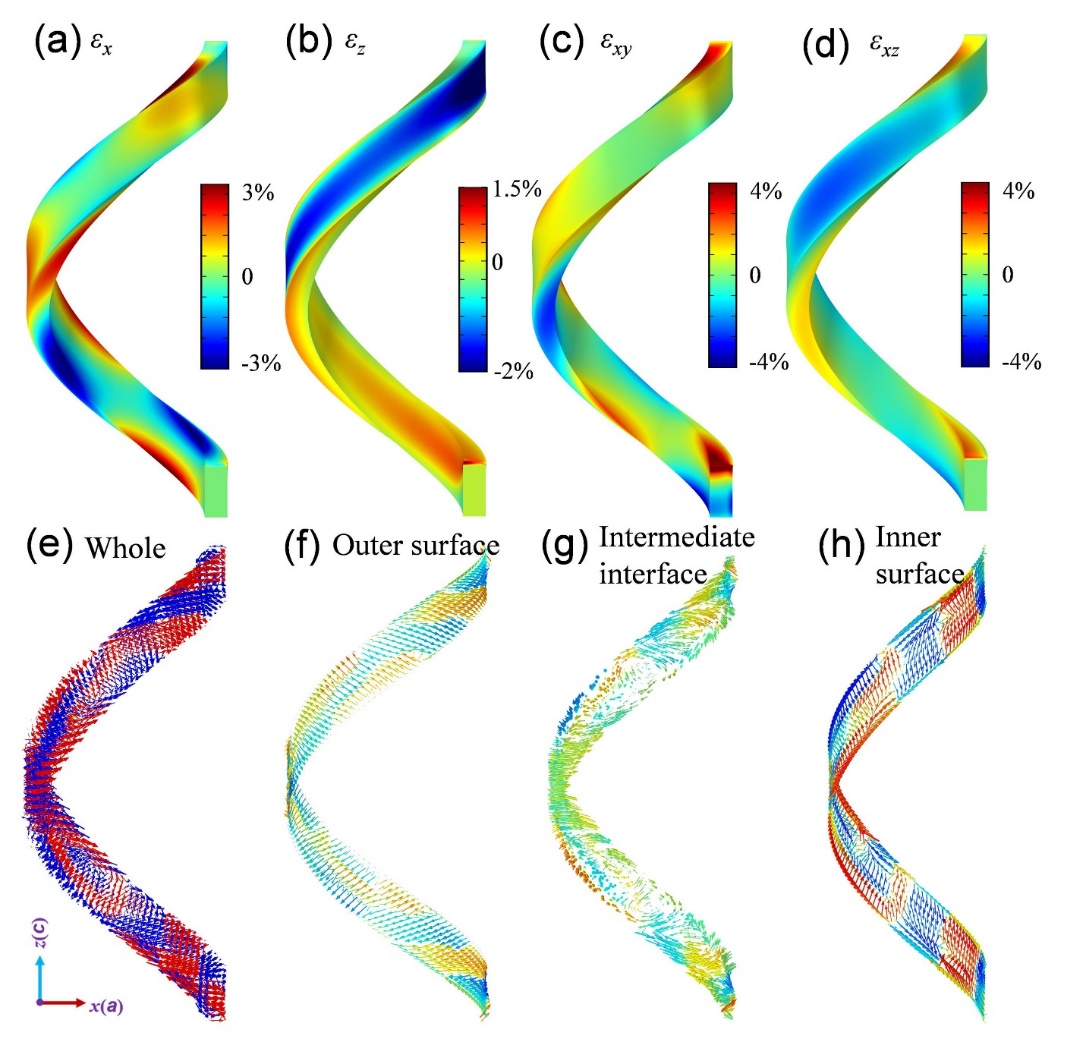


**Figure S13 The distribution of strain and polarization in BTO nano-spring under tensile deformation (tensile displacement *z*=50 nm).** (a-d) The distribution of strain components *εx*, *εz*, *εxy*, and *εxz*. (e-h) The polarization distribution of the (e) whole, (f) outer surface, (g) intermediate interface, and (h) inner surface of nano-spring.


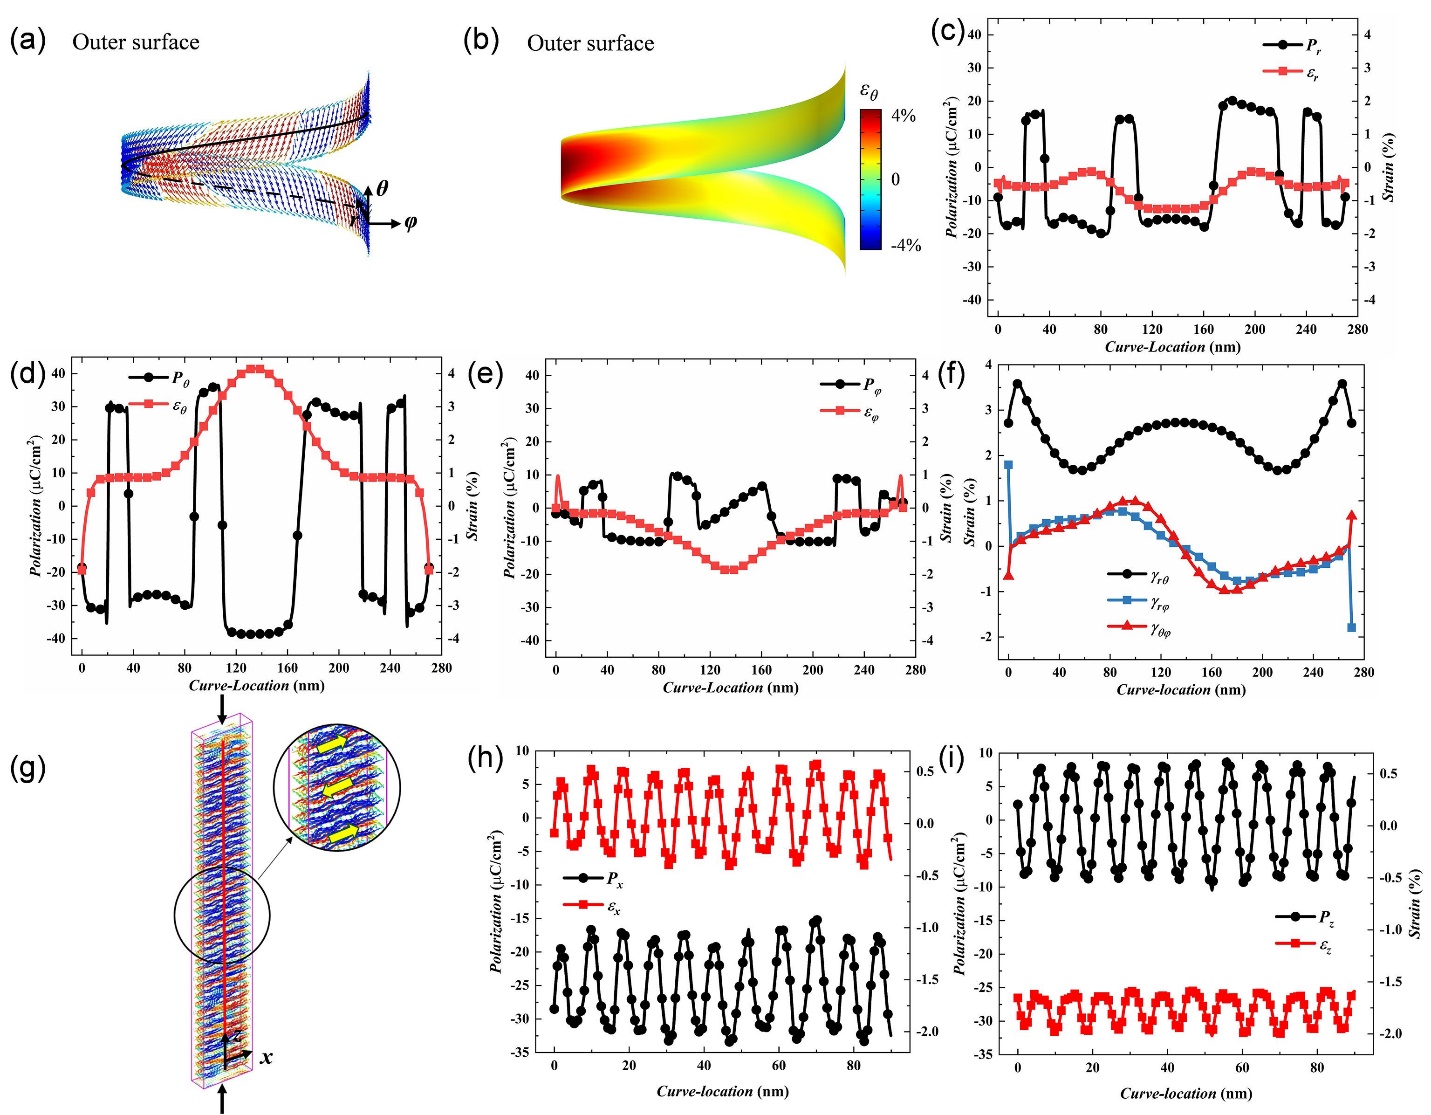


**Figure S14** **The distribution of polarization and strain on the outer surface of the BTO nano-spring and thin film under compressive deformation.** (a-b) The distribution of (a) polarization and (b) strain *εθ* on the outer surface of the nano-spring. (c-e) The distribution of (c) *Pr*–*εr*, (d) *Pθ*–*εθ*, and (e) *Pφ*–*εφ* on the middle line of the outer surface of BTO nano-spring. (f) The distribution of shear strain *γrθ*, *γrφ*, and *γθφ* on the center line of the outer surface of nano-spring. (g) The distribution of polarization of the thin film. (h-i) The distribution of (h) *Px*–*εx* and (i) *Pz*–*εz* on the middle line of the outer surface of BTO thin film under compressive deformation.


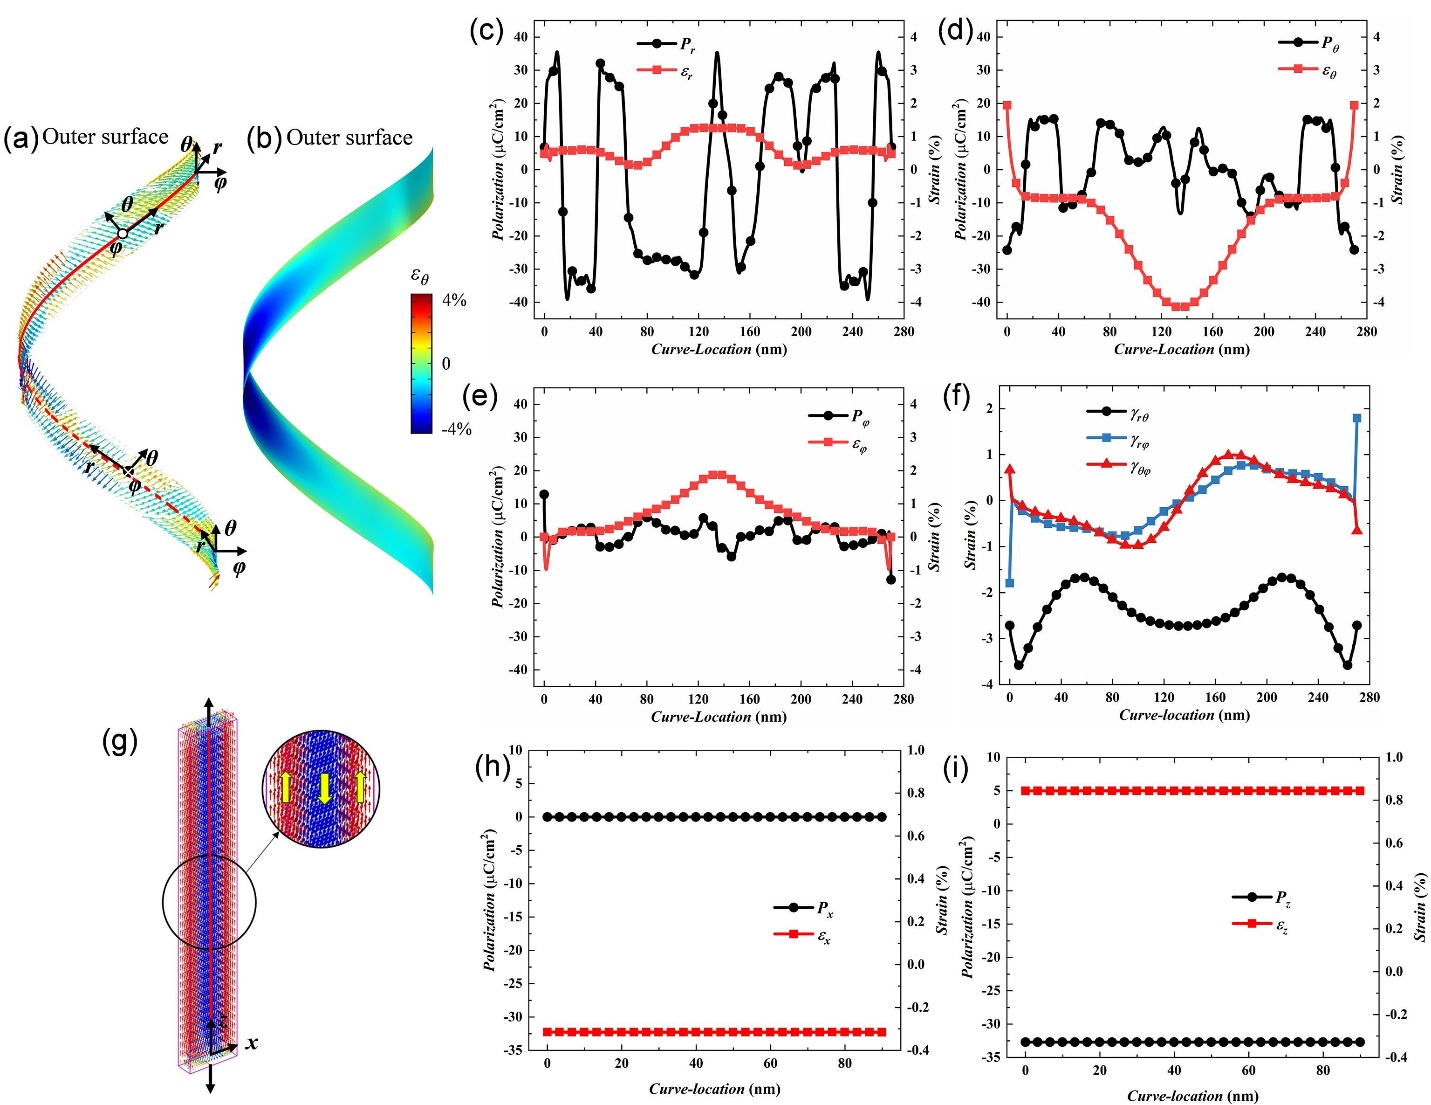


**Figure S15** **The distribution of polarization and strain on the outer surface of the BTO nano-spring and thin film under tensile deformation.** (a-b) The distribution of (a) polarization and (b) strain *εθ* on the outer surface of the nano-spring. (c-e) The distribution of (c) *Pr*–*εr*, (d) *Pθ*–*εθ*, and (e) *Pφ*–*εφ* on the middle line of the outer surface of BTO nano-spring. (f) The distribution of shear strain *γrθ*, *γrφ*, and *γθφ* on the center line of the outer surface of nano-spring. (g) The distribution of polarization of the thin film. (h-i) The distribution of (h) *Px*–*εx* and (i) *Pz*–*εz* on the middle line of the outer surface of BTO thin film under tensile deformation.


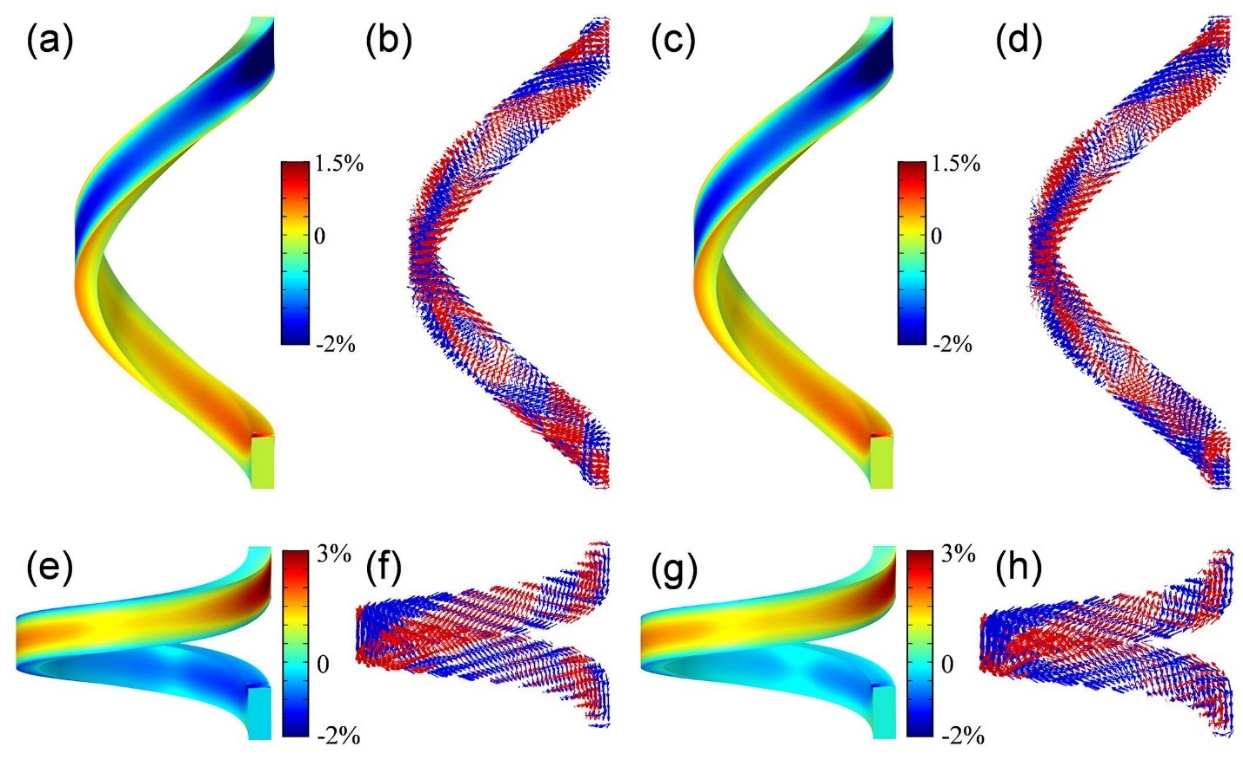


**Figure S16** **The flexoelectric effect on BTO nano-spring under mechanical deformation (the deformation displacement *z*=50 nm).** (a-b) The distribution of strain *εz* and polarization under tensile deformation without flexoelectric effect. (c-d) The distribution of strain *εz* and polarization under tensile deformation with flexoelectric effect. (e-f) The distribution of strain *εz* and polarization under compression deformation without flexoelectric effect. (g-h) The distribution of strain *εz* and polarization under under compression deformation with flexoelectric effect.

Table S1

Lattice parameters of the LSMO/BTO/SAO heterostructures

| Layer | *c* (Å) | *a* (Å) |
| --- | --- | --- |
| LSMO | 3.830 | 3.924 |
| BTO | 4.033 | 3.986 |
| SAO | 3.956 | 3.980 |
|  |  |  |

Table S2

Values of parameters used in this work (SI units and T at 300 K).

| Parameter | Value | Parameter | Value |
| --- | --- | --- | --- |
|  |  |  | -0.0452 |
|  |  |  | 0.0578 |
|  |  |  |  |
|  |  |  |  |
|  |  |  |  |
|  |  |  | 7.35 |
|  |  |  | -18.2 |
|  |  |  | -23.6 |
|  |  |  | 0 |
|  |  |  |  |

**References:**

1. L.-Q. Chen, Phase-Field Method of Phase Transitions/Domain Structures in Ferroelectric Thin Films: A Review. *J. Am. Ceram. Soc.* **91**, 1835-1844 (2008).

2. T. Sluka, A. K. Tagantsev, D. Damjanovic, M. Gureev, N. Setter, Enhanced electromechanical response of ferroelectrics due to charged domain walls. *Nat. Commun.* **3**, 748 (2012).

3. B. Wang, Y. Gu, S. Zhang, L.-Q. Chen, Flexoelectricity in Solids: Progress, Challenges, and Perspectives. *Prog. Mater Sci.*, (2019).
